# Supplementary material for: The Activity of the Stress Modulated Arabidopsis Ubiquitin Ligases PUB46 and PUB48 is Partially Redundant
Source: bioRxiv or medRxiv preprint supplement (doi:10.1101/2021.10.10.463813), 2021-10-10
Supplement: Supplementary file [file media-1.pdf]

## Supplementary Material

TCTAGAGTCGACATACTCGCTGTTTTGAATTGATGTTTTAGGAATATATAT  
GTAGAACCGATTAGAATACTGACTTTCACAGGTCGTGATATGATTCAATTA  
GCTTCCGACTCATTTCATCCAAATACCGAGTCGCCAAAATTCAAACCTAGACT  
CGTTAAATGAATGAATGATGCGGTAGACAAATTGGATCATTGATTCTCTTT  
GATAGTCAGGATTCTAATCGCTTCTCTCTTTTGTATTCCAATTTCTTGAT  
TAATCTTTCCTGCACAAAACATGCTTGGATCC

Supplementary Fig. 1. Nucleotide sequence of the aMIR46-48 construct.

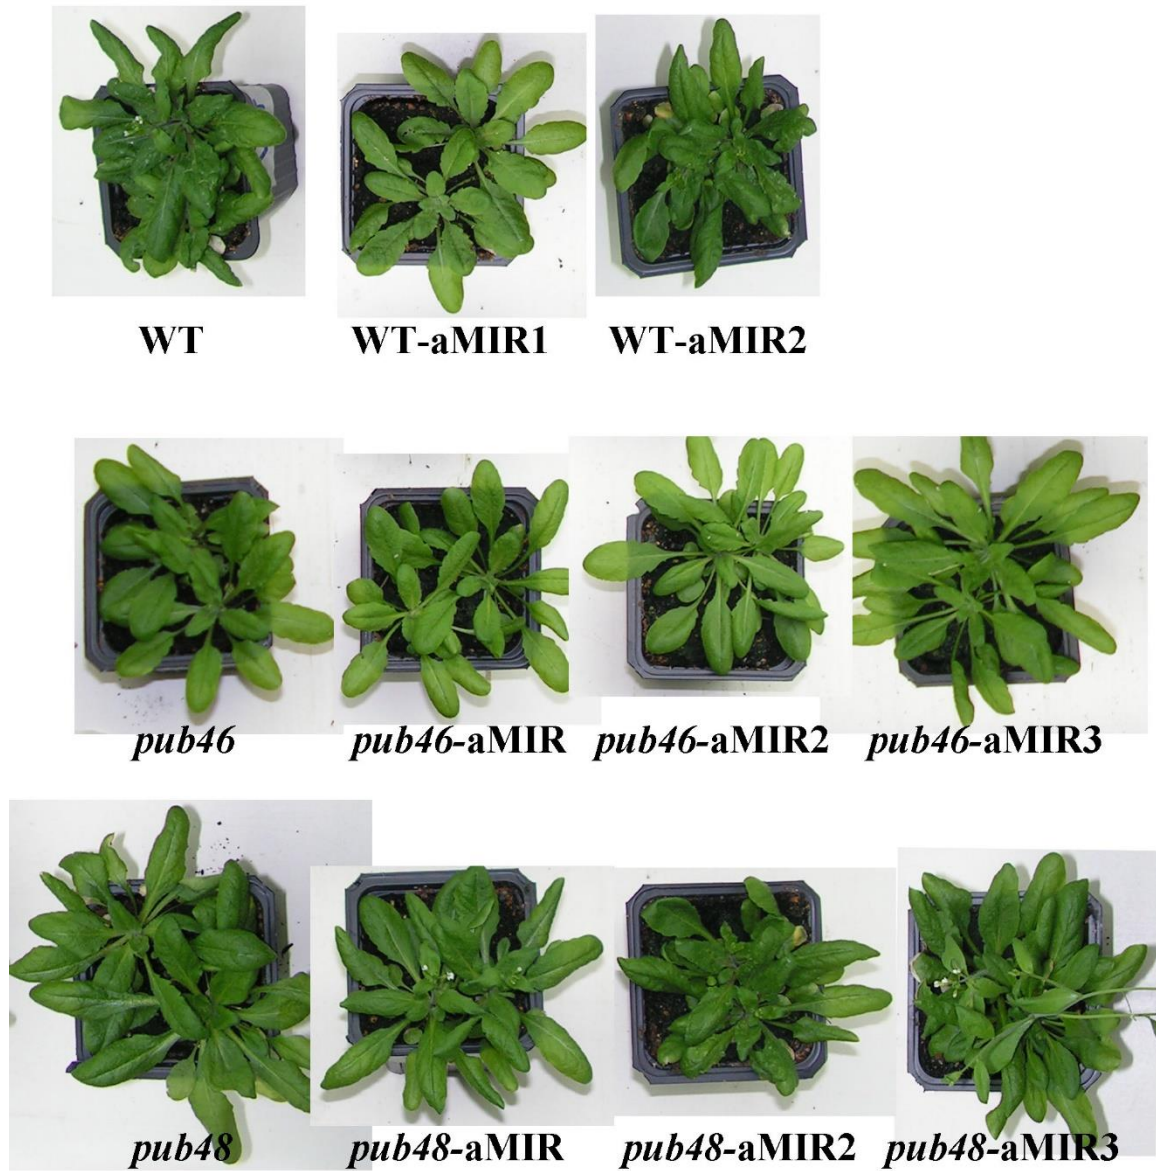

Supplementary Fig. 2. Irrigated control plants of the genotypes tested for drought stress shown in Fig. 3.
